# Supplementary material for: Cyclic–hanging-multicyclic polymer synthesized by ladderphane-mediated blocking-cyclization technique for the direct visualization of cyclic macromolecular topology
Source: Royal Society of Chemistry journal article supplement (doi:10.1039/d3py00159h), 2023-01-01
Supplement: d3py00159h1.pdf [file d3py00159h1.pdf]

## Electronic Supplementary Information (ESI)

### **Cyclic-hanging-multicyclic polymer synthesized by ladderphane-mediated blocking-cyclization technique for direct visualization of cyclic macromolecular topology**

Cuihong Ma,<sup>a,b,†</sup> Ying Quan,<sup>a,†</sup> Xiaojuan Liao,<sup>a</sup> Ruyi Sun<sup>a\*</sup> and Meiran Xie<sup>a\*</sup>

*<sup>a</sup>School of Chemistry and Molecular Engineering, East China Normal University, Shanghai 200241, China. E-mail: rysun@chem.ecnu.edu.cn, mrxie@chem.ecnu.edu.cn*

*<sup>b</sup>Ministry of Education Key Laboratory of Macromolecular Synthesis and Functionalization, Department of Polymer Science and Engineering, Zhejiang University, Hangzhou, Zhejiang 310058, China.*

<sup>†</sup>These authors contributed equally.

## Supplementary Data

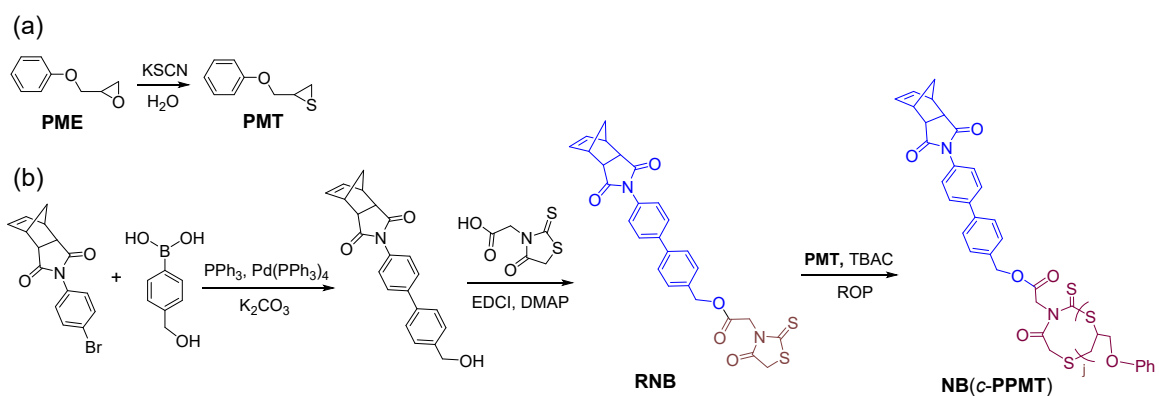

**Scheme S1** Synthetic routes of **PMT** (a) and cyclic side chain-containing macromonomer **NB(c-PPMT)** (b).

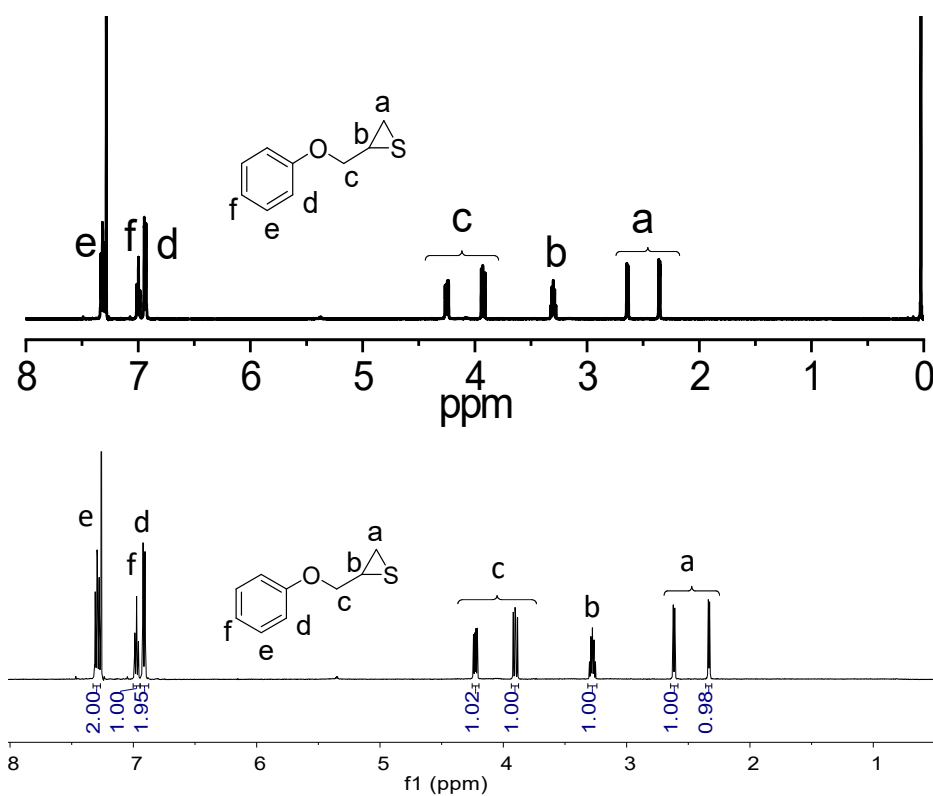

**Fig. S1** <sup>1</sup>H NMR (500 MHz) spectrum of **PMT** measured in CDCl<sub>3</sub> at 25 °C.

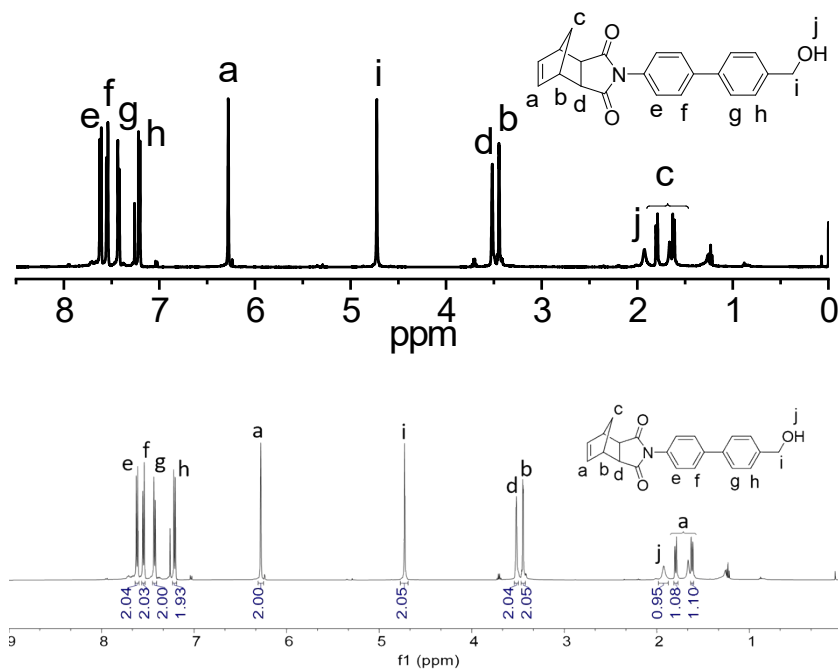

**Fig. S2**  $^1\text{H}$  NMR (500 MHz) spectrum of N-(4-hydroxymethylbiphenyl)-norbornene dicarboximide measured in  $\text{CDCl}_3$  at 25  $^\circ\text{C}$ .

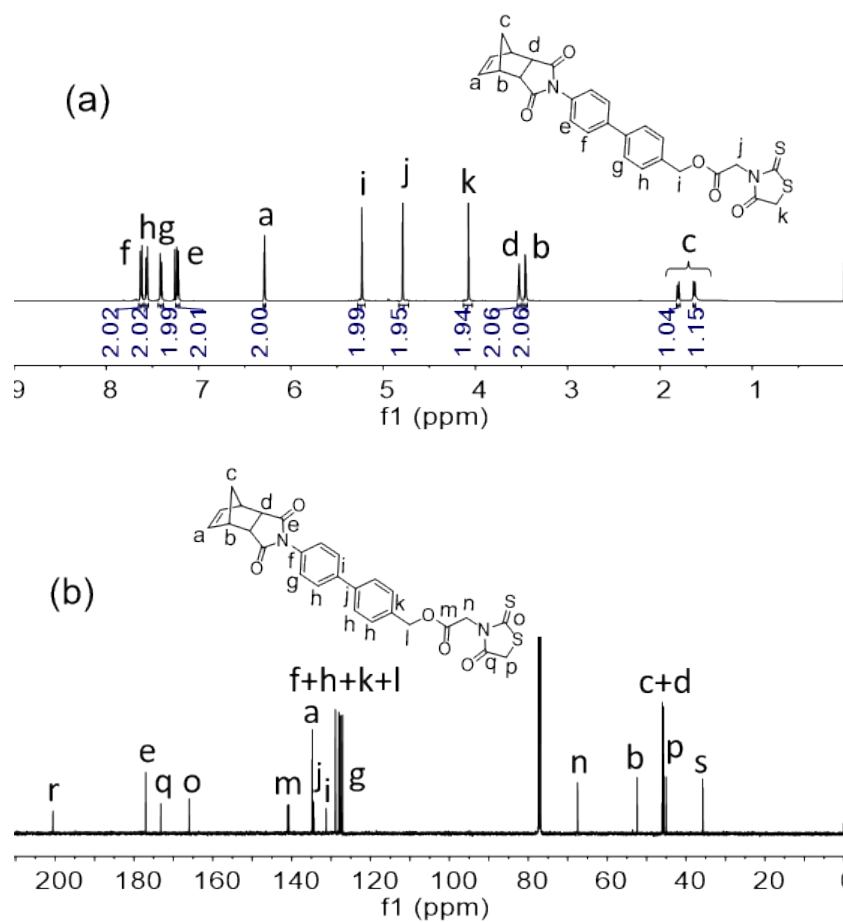

**Fig. S3**  $^1\text{H}$  NMR (a) and  $^{13}\text{C}$  NMR (b) spectra of **RNB** measured in  $\text{CDCl}_3$  at 25  $^\circ\text{C}$ .

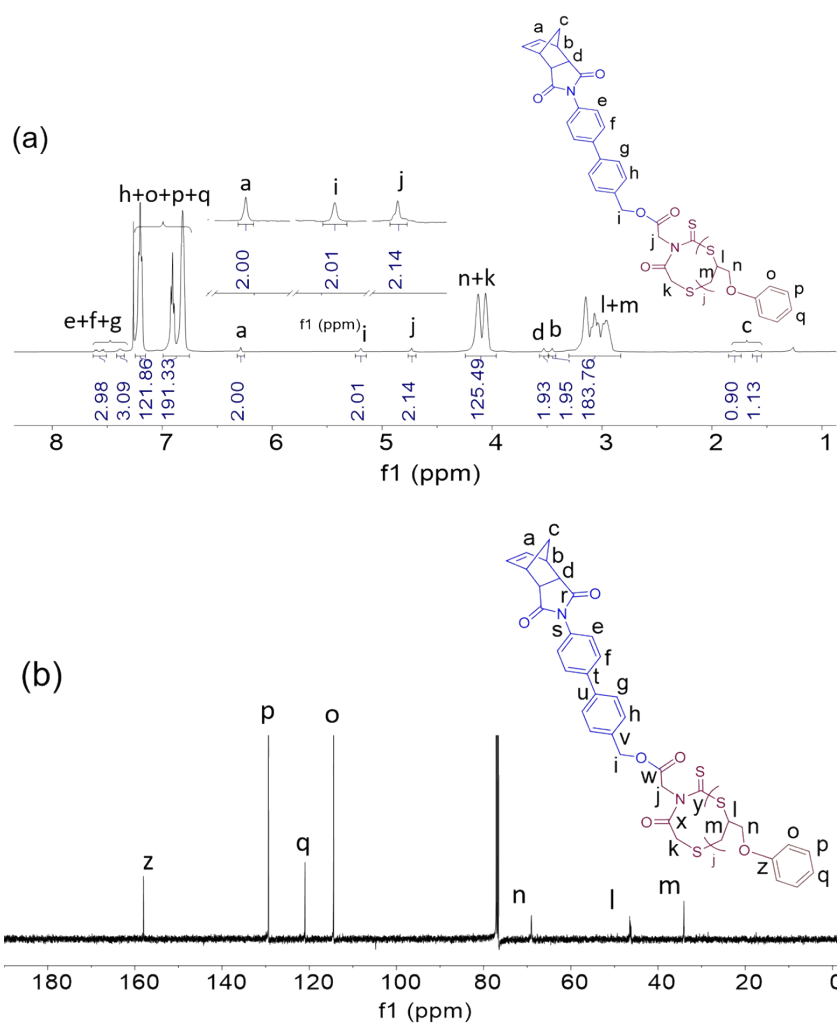

**Fig. S4**  $^1\text{H}$  NMR (a) and  $^{13}\text{C}$  NMR (b) spectra of cyclic side chain-contained macromonomer **NB(c-PPMT)** measured in  $\text{CDCl}_3$  at  $25^\circ\text{C}$ .

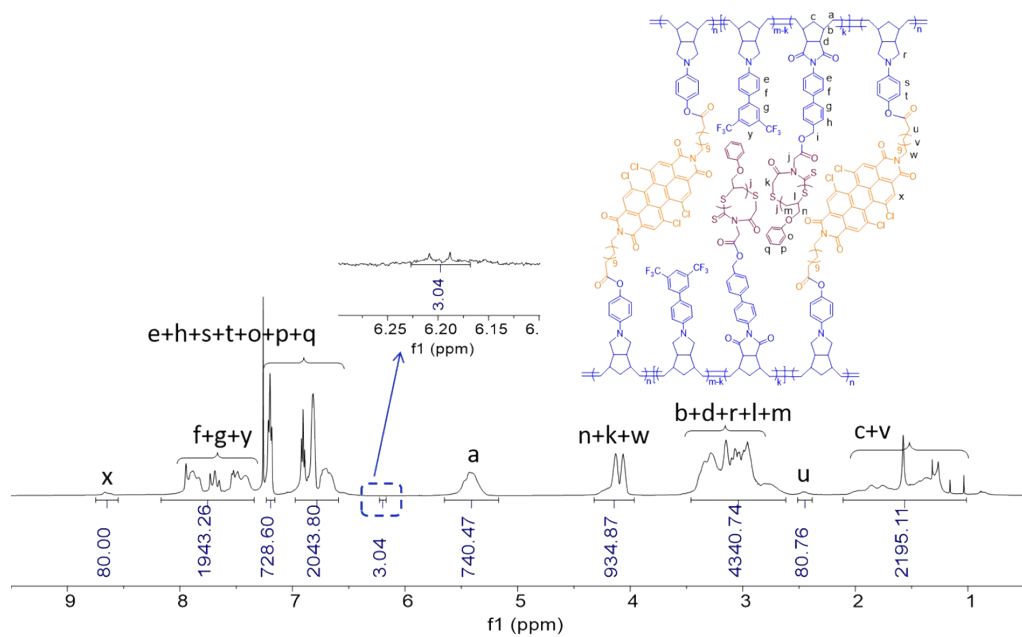

**Fig. S5**  $^1\text{H}$  NMR spectrum of  $c\text{-}\{\text{PBNP}_{10}\text{-}[b\text{-P}(\text{TNP}_{195}\text{-CO-NB}(c\text{-PPMT})_5)_2\text{-}b\text{-PBNP}_{10}]\}$  in  $\text{CDCl}_3$ .

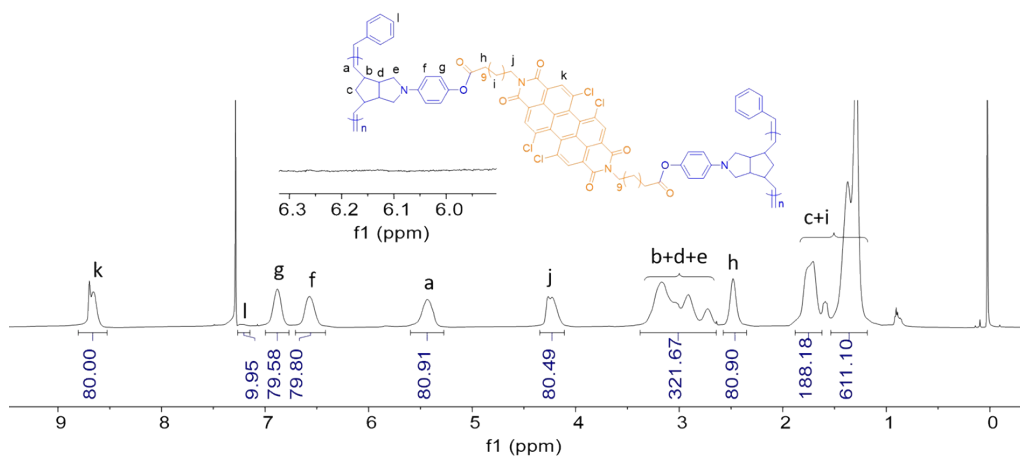

Fig. S6 <sup>1</sup>H NMR spectrum of PBNP<sub>20</sub> in CDCl<sub>3</sub>.

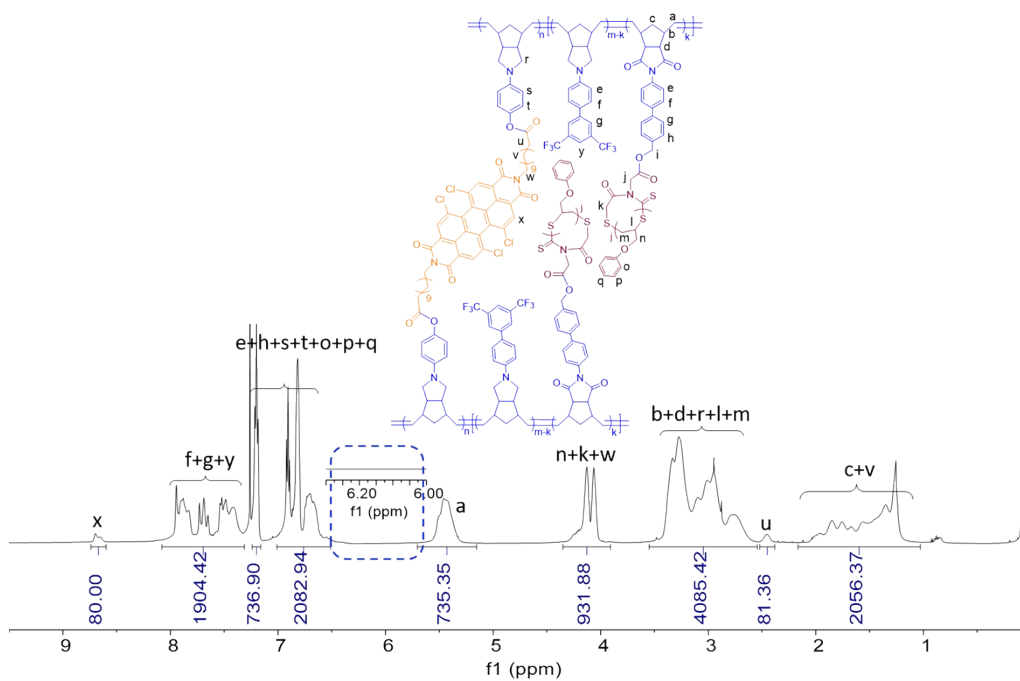

Fig. S7 <sup>1</sup>H NMR spectrum of *l*-{PBNP<sub>20</sub>-*b*-[P(TNP<sub>195</sub>-*co*-NB(*c*-PPMT)<sub>5</sub>)]<sub>2</sub>} in CDCl<sub>3</sub>.

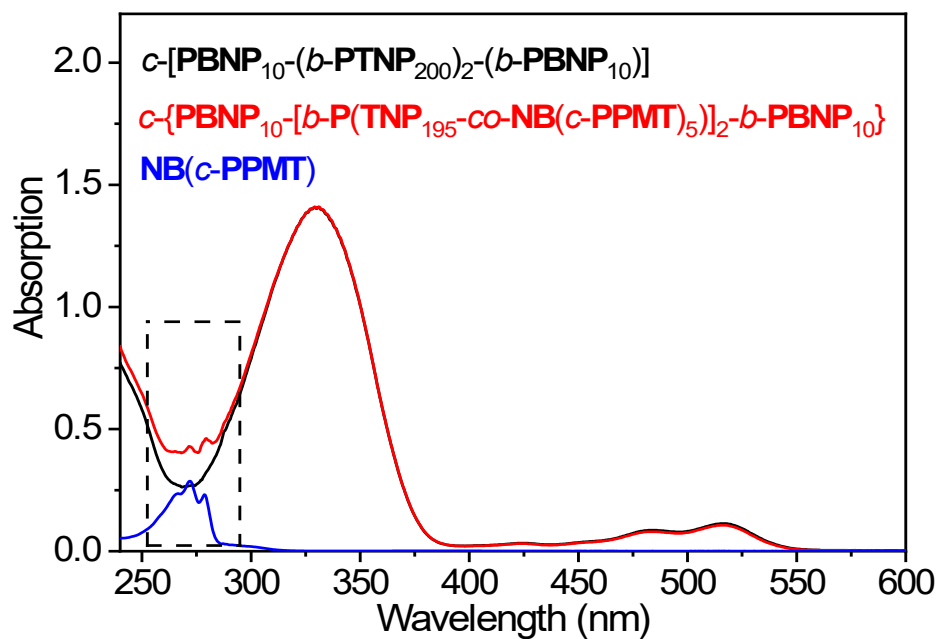

Fig. S8 UV-vis spectra of polymers.

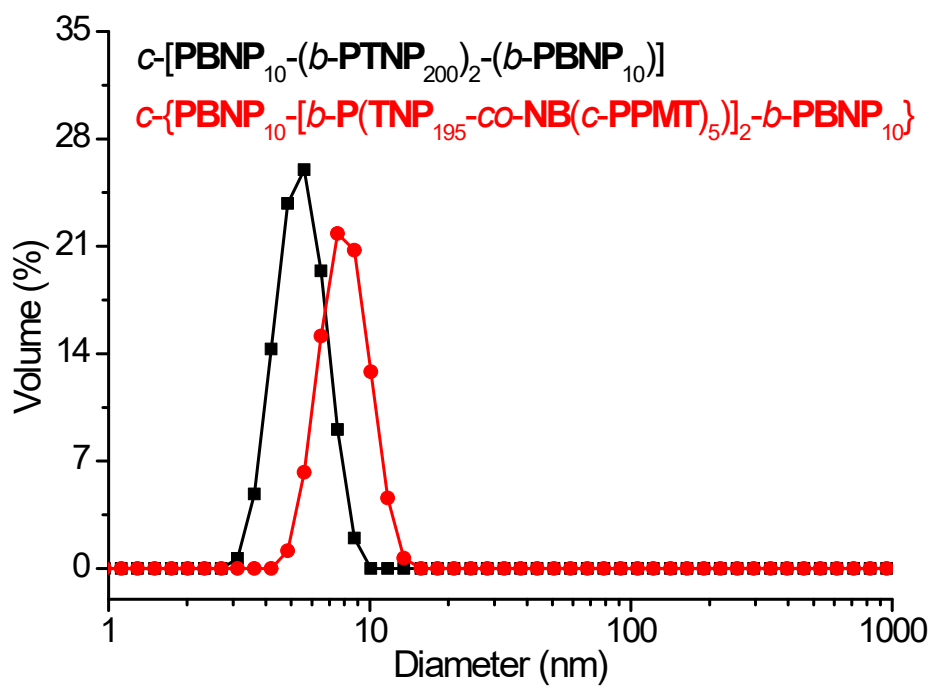

Fig. S9 DLS diagrams of cyclic polymers in THF at  $2 \text{ mg mL}^{-1}$ .
